# Supplementary material for: Implementing a hydrodynamic model to complement water depth and flow velocity data for physical scale experiments of rivers and estuaries
Source: Copernicus journal article supplement (doi:10.5194/esurf-2020-14), 2020-03-17
Supplement: Supplementary file 1 [file esurf-2020-14-supplement.zip]

Archive with 3 entries (3 files):
- iRIC_manual.pdf
- SupplementaryFigures.pdf
- SupplementaryMovie_MetronomeFlow.gif
