# Supplementary material for: Implementing a hydrodynamic model to complement water depth and flow velocity data for physical scale experiments of rivers and estuaries
Source: Copernicus journal article supplement (doi:10.5194/esurf-2020-14), 2020-03-17
Supplement: Supplementary file 1 [file esurf-2020-14-supplement.zip › SupplementaryFigures.pdf]

# Supplementary figures to

## Implementing a hydrodynamic model to complement water depth and flow velocity data for physical scale experiments of rivers and estuaries

Steven A.H. Weisscher<sup>\*1</sup>, Marcio Boechat Albernaz<sup>1</sup>, Jasper R.F.W. Leuven<sup>1</sup>,  
Wout M. Van Dijk<sup>1</sup>, Yasuyuki Shimizu<sup>2</sup>, and Maarten G. Kleinhans<sup>1</sup>

<sup>1</sup>Faculty of Geosciences, Utrecht University, Princetonlaan 8A, 3584 CB, Utrecht, The Netherlands

<sup>2</sup>Faculty of Engineering, Hokkaido University, North 13, West 8, Kitaku, Sapporo, Hokkaido,  
080-8628, Japan

February 13, 2020

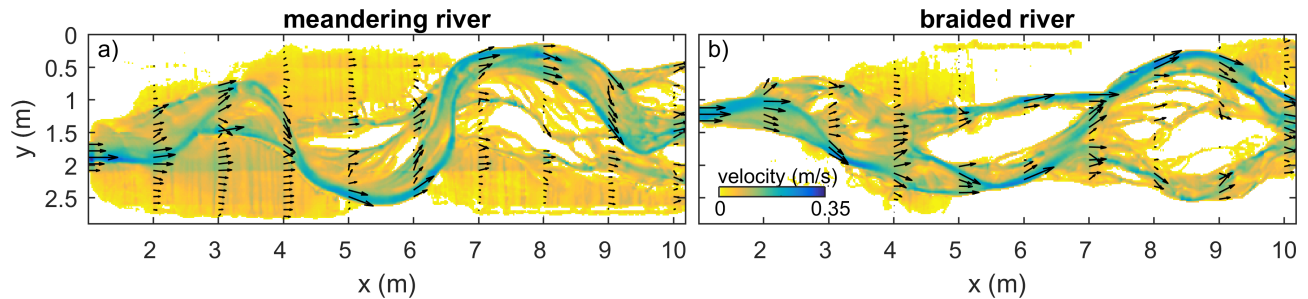

**Figure S1:** Modelled flow velocity for (a) the meandering and (b) the braided rivers by Van Dijk et al. (2013a).

---

<sup>\*</sup>Corresponding author

Email address: s.a.h.weisscher@uu.nl

Tel. 0031 30 253 7641

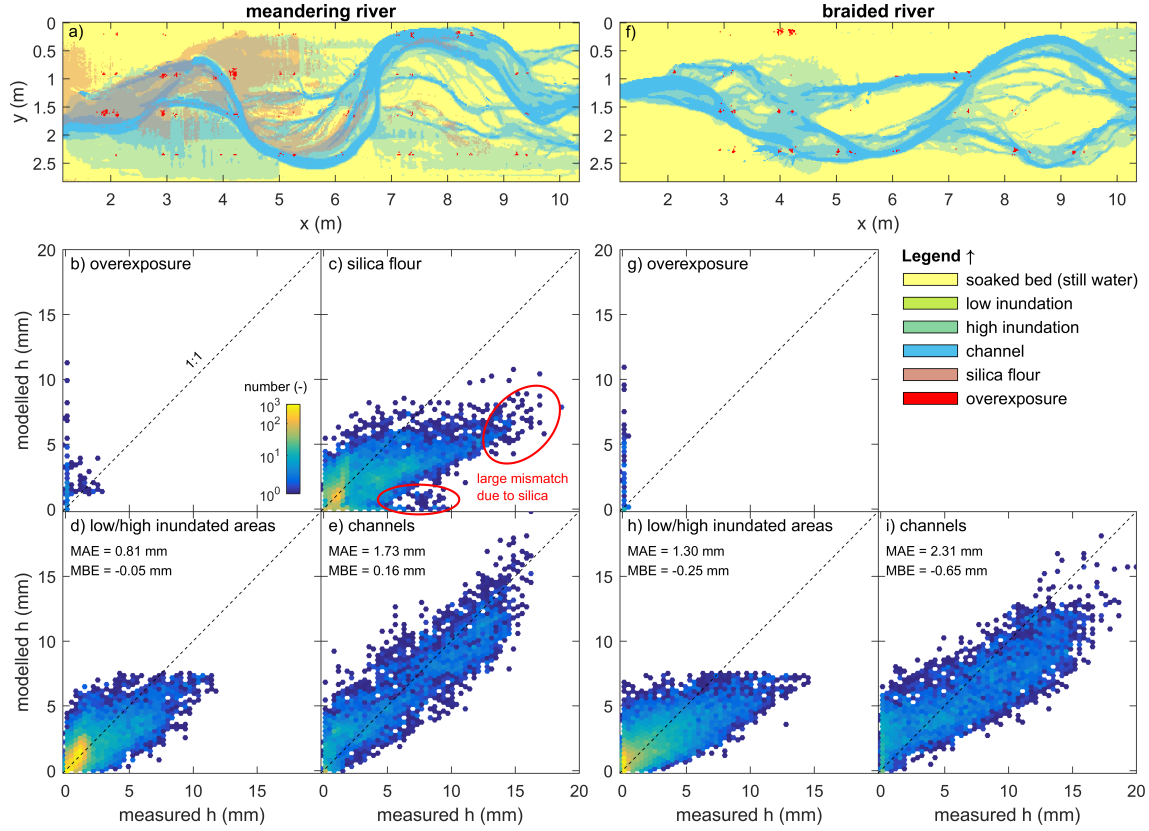

**Figure S2:** Inundation maps for the (a) meandering and (f) braided rivers by Van Dijk et al. (2013a), with modelled versus measured water depths divided into (b/g) cases of overexposure, (c) silica flour, (d/h) low/high inundated areas (i.e., submerged floodplain and bars, swale channels) and (e/i) channels. Large mismatches are in the measured data due to overhead light overexposure and white silica flour that distorts the extraction of measured water depth. Scatter density plots d), e), h) and i) are identical to those in Fig. 5.

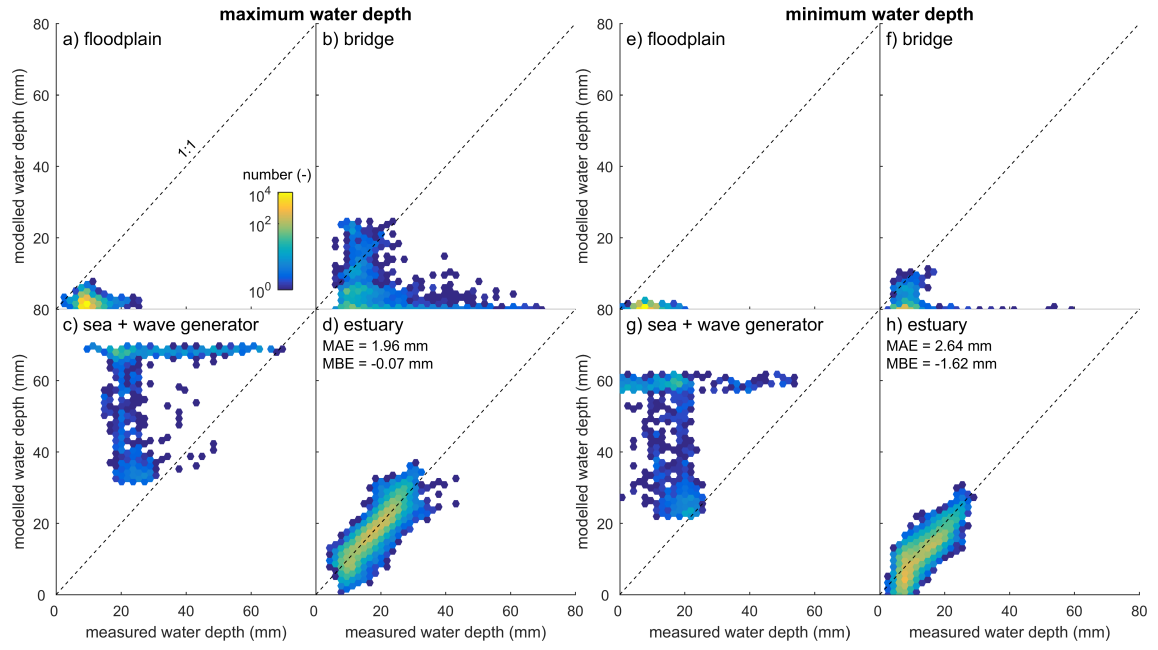

**Figure S3:** Same as Fig. 5e,f, but also including cells with incorrect measured water depth corresponding to artificial obstructions (i.e. the bridge and wave generator) and the sea with artificial grass. The green grass distorts the water colour saturation with respect to the sand for which the colour conversion was calibrated. Consequently, measured water depths are underestimated for the sea part in the experiment.

## References

Van Dijk WM, Van de Lageweg WI, Kleinhans MG. 2013a. Formation of a cohesive floodplain in a dynamic experimental meandering river. *Earth Surface Processes and Landforms*, 38 (13):1550–1565.
